# Supplementary material for: The association between time-of-day of habitual exercise training and changes in relevant cancer health outcomes among cancer survivors
Source: PLoS One. 2021 Oct 12;16(10):e0258135. doi: 10.1371/journal.pone.0258135 (PMC8509995; doi:10.1371/journal.pone.0258135)
Supplement: S1 File — (XLSX) [file pone.0258135.s001.xlsx]

## Sheet: Data
ID	ExerciseTiming	Gender	Race	Ethnicity	CancerStage	CancerType	TimeOfDay_FollowUp	BMI	Age	MET_change	PeakV02_change	ChestPress10RM_change	LegPress10RM_change	LatPullDown10RM_change	FACITFatigue_change	FACTG7_change	Weight_change	TimedUPandGO_change	ChairStand_change	WaistCircumference_change	HipCircumference_change	Handgrip_Right_change	Handgrip_Left_change	BMI_change
1	1	2	1	2	4	1	1	31.7	78	0	0		15				0.553773	-1.38	2	1	0	-2	1	0.18
2	1	2	1	2	5	2	2	23.36	43				45		4	1	3.17962	0.06	5	3	2	1	-3	0.9
3	1	1	1	2	1	3	1	28.01	67			10	15	-10			-1.77178	-0.61	1	-1	-2	10	4	-0.65
4	1	1	1	2	5	3	1	37.1	54	1.08	3.78				-1	0	-2.05626	-0.6	-8	2.5	0	-5	-3	-0.71
5	1	1	1	2	3	3	1	30.14	51	0	0	0	0	0	-35	-10	-0.715498	0.06	1	-9	0.5	-4	0	-0.22
6	1	1	1	2	3	3	2	26.42	45			0	0	0			0.95226	0	0	0	0	0	0	0.41
7	1	1	1	2	1	3	1	25.98	55			0	15	10			0.470544	-0.1	-2	4	8.5	6	-2	0.17
8	1	1	1	2	1	3	1	21.4	55			10	45	10	18	11	-1.52856	-0.2	2	-11	-4	5	7	-0.47
9	1	1	1	2	1	3	1	25.68	56			10	45	10	-5	1	-0.421549	-0.63	5	-1.5	0	0	-1	-0.15
10	1	1	1	2	2	3	1	26.68	65	0	0	10	30	10	38	15	1.85855	-0.01	1	-2.5	3	-5	-9	0.6
11	1	1	1	2	5	3	1	36.75	59	1.15429	4.04	0	-15	-10			0.579227	0.1	0			-2	-2	0.2
12	1	1	1	2	1	3	2	24.14	54	2.23429	7.82				6		-0.566814	-0.22	0	4.5	1	-1	0	-0.19
13	1	1	1	2	1	3	1	29.53	69	-2.31429	-8.1	0	-30	10	1	0	4.78308	-1.19	-4	0	8	-8	-9	1.81
14	1	1	6	3	2	3	1	23.78	38	0	0					5	-0.237833	0.05	-6	-12	-5.5	-4	0	-0.09
15	1	1	1	2	1	3	2	23.78	56	1.08	3.78	20	30	20	4		9.29502	-0.07	4	4	4	4	7	3.41
16	1	1	1	2	3	3	2	30.04	54	1.15429	4.04	10	60	20	4	5	2.87681	-0.09	9	0.5	1	5	3	1.16
17	1	1	6	1	2	3	2	23.96	56	0	0	10	45	10	40	13	-0.95226	0.01	10	-13.5	-12.5	2	0	-0.41
18	1	1	1	2	1	3	1	29.7	69	0	0		30		5	5	2.07593	-1.22	6	2	1.5	1	2	0.75
19	1	1	1	2	1	3	2	23.58	30			-20	0	-10	-1		6.04113	-0.1	-2	0.5	6.5	0	-2	2.04
20	1	1	1	2	2	3	1	27.4	46	2.45429	8.59	10		10	5	-2	1.13631	-0.1	7	0.5	0	11	12	0.43
21	1	1	1	2	2	3	1	35.59	32			10	15	20	15	4	3.81854	-1.16	1	-2.5	1	3	0	1.28
22	1	1	1	2	2	3	1	22.16	58	1.37429	4.81				7	3	-2.47309	-0.07	3	-4	0	2	0	-0.88
23	1	1	1	2	1	3	1	29.61	67	1.08	3.78	10	15	10	7	0	1.13631	-0.82	0	-3	9.5	-2	2	0.43
24	1	1	1	2	1	3	1	22.8	48	0	0	10	30	10	-13	-1	-0.264071	0.22	0	6	1.5	-2	-2	-0.11
25	1	1	1	2	1	3	2	30.02	72	-6.18	-21.63	10	15	10	-1		4.67738	-0.37	3	2	3	3	2	1.77
26	1	1	1	2	1	3	1	38.55	71	1.52571	5.34	10	60	10	-11	-8	-4.51911	-1.66	2	1	0.5	6	2	-1.67
27	1	1	1	2	1	3	2	27.62	81	1.45143	5.08	10	30	10	16	7	0.768208	-1.5	9	2.5	-3	2	1	0.32
28	1	1	1	2	5	3	1	27.36	68	0	0				43	15	-1.1902	-0.61	0	-1	-2	4	4	-0.43
29	1	1	1	2	2	3	1	21.26	81	1.54571	5.41					0	-0.051213	-0.71	12	1	-1.5	-2	2	-0.02
30	1	1	1	2	2	3	2	24.65	57	0	0	5	0	10		6	-1.26844	-0.36	3	-1.5	0.5	-10	-8	-0.48
31	1	1	1	2	3	3	2	25.69	72	1.15429	4.04	0	0	5	-1	-2	4.8646	0.14	6	2.5	0	2	-6	2.06
32	1	1	1	2	1	3	1	22.5	68	2.38857	8.36	10	30	10	-27	-9	-2.47504	0.07	0	0	-2	0	0	-0.99
33	1	1	1	2	1	3	2	33.9	76	0	0	0		10	11	-2	-2.38879	1.57	9	-0.5	4	3	0	-0.89
34	1	1	1	2	3	3	1	27.09	67								0.898479	-0.4	0	-2	3	1	0	0.34
35	1	1	1	2	4	3	1	30.54	63	-1.15429	-4.04			0			2.29821	-0.47	0	-2.5	0	1	-1	0.83
36	1	1	1	2	1	3	1	22.65	70	1.28286	4.49						-0.580646							-0.25
37	1	1	1	1	1	3	1	27.92	70	3.11429	10.9	10		5	3	2	-1.84703	-1.74	6	1.5	3	1	0	-0.71
38	1	1	1	2	3	3	1	22.25	67	2.31429	8.1						-0.44924	-0.39	3	0	0	2	2	-0.17
39	1	1	1	2	2	3	1	29.77	65			20		40			2.93327	-0.56	8	-4	1.5	2	1	1.11
40	1	2	1	2	3	5	1	29.1	43			10	30	10			-4.80713	-1.75	3	-2	-1	-1	1	-1.29
41	1	1	1	2	3	5	2	24.63	53	1.23429	4.32	10	60	20	0	1	2.64071	-0.21	4	4	3	6	4	1.1
42	1	1	1	2	3	5	1	21.5	70	2.45429	8.59				-10		0.898479	-0.39	7	-2	-0.5	1	-1	0.34
43	1	1	1	2	2	6	1	29.3	53	1.23429	4.32	-5	15	0	3	3	-1.27234	0.64	-13	-6	-12.5	2	0	-0.53
44	1	1	1	2	1	6	2	23.09	65	1.15429	4.04	10		10	15		0.272801	0.05	-2	6.5	3	-1	2	0.11
45	1	1	1	2	3	6	1	32.21	69	0	0	5	0	0			-0.576156	-0.67	0	1	1	-4	-4	-0.24
46	1	1	1	2	3	6	1	22.12	60	0	0	10		0	-4	-1	0.264071	-0.36	-2	1.5	1	-1	-2	0.11
47	1	1	1	2	4	6	1	18.88	56			0	30	10	3	7	-0.0289613	-0.52	0		1	10	8	-0.01
48	1	1	1	2	3	7	1	47.43	58	0.8	2.8					1	-0.654195		4	-3	-1.5	6	12	-0.24
49	1	2	1	2	6	10	2	32.48	65	1.23429	4.32	15	15	0			-2.0736	-0.37	8	-8	1	4	2	-0.62
50	1	2	1	2	6	10	2	27.71	63	1.08	3.78				8		-6.73356	-0.38	1	-0.5	0	2	-4	-2.13
51	1	2	1	2	6	10	1	30.78	48						-4	-2	-14.9441		13			3	-2	-5.16
52	1	2	1	2	6	10	1	36.97	82						-5	-4	1.81977	-3.3	3	11	2	-2	-6	0.61
53	1	1	1	2	4	10	1	17.11	40	1.15429	4.04	5	30	5	-7	0	3.35275	-0.12	13			1	2	1.23
54	1	1	1	2	4	12	1	31.12	62	1.15429	4.04				23	6	5.56951							2.32
55	1	2	1	2	1	13	1	25.6	89	0.425714	1.49				32	8	1.48581	21.03	-20.79	3.5	3.5	0	0	0.47
56	1	2	1	2	4	13	1	35.25	72						-13	0	0.43442		-5	-11	3	0	0	0.15
57	1	2	1	2	4	13	1	26.32	73	0	0	20	45	20	5		1.13714	-0.36	3	-0.5	6	-4	-2	0.34
58	1	1	1	2	4	13	1	33.21	76	-1.60286	-5.61		-30		19		3.54107	0.87	-5	12	-0.5	0	0	1.34
59	1	2	6	3	5	14	1	29.51	61	1.08	3.78	10	0	10	1	-2	-1.20403	-0.7	3	5	0			-0.36
60	1	2	1	2	5	14	1	23.99	56								0.893899	-0.26	3	1.5	2	2	3	0.26
61	1	1	1	2	1	14	1	20.98	54	1.08	3.78				6	6	-2.69341	-0.45	-6	5	-5.5	4	8	-0.93
62	1	1	1	2	3	14	1	36.02	67	-0.857143	-3	-30		-20	-3	-1	-14.0068	4.02	-1	-10.5	-14.5	-18	-18	-5.47
63	1	2	1	2	4	16	1	23.3	72			20	45	30	11	5	0.505807	0.07	8	-5	-1	6	-26	0.16
64	1	1	1	2	1	16	1	23.03	64			20	30	20			3.41579	-0.82	4			2	5	1.4
65	1	1	1	2	5	16	1	32.99	69	0.725714	2.54	0	45	10			-1.09148	-1.2	4			-2	3	-0.44
66	1	1	1	2	2	16	1	21.36	70	0	0						-1.01457	-0.81	-2	7.5	-2	5	2	-0.39
67	1	2	1	2	4	16	1	21.55	41							2	0.31613	-4.05	9	-1	-2	-2	3	0.1
68	1	2	1	2	1	18	1	24.62	67	2.23429	7.82	20	45	20	17		-1.44399	-0.45	9	-5	-2.5	-3	-5	-0.42
69	1	1	1	2	3	19	1	21.75	59	2.31429	8.1	10	45	10	0	1	3.34122	-0.65	9	-3	2	-2	-1	1.12
70	1	1	1	2	4	19	1	25.6	53	4.84286	16.95	10	30	10	18	5	2.11397	-0.31	8	2	1.5	8	4	0.65
71	1	1	1	2	4	19	1	23.6	46			10	15	10	-13	4	-3.72353	-0.15	4	-3	-1.5	2	4	-1.23
72	1	1	1	2	3	19	2	22.28	71	2.31429	8.1						-0.993094		11	-3.5	-3	-4	-2	-0.37
73	1	2	1	2	2	20	2	24.78	63						6	-5	0.0921486			-1.5	1	2	1	0.03
74	1	1	1	2	1	21	1	39.85	76			5	-15	10		1	0.924905	0.1	3	3	3	-4	1	0.35
75	1	2	1	2	2	23	1	27.21	74	1.23429	4.32	-10	30	0			-5.04101	-0.24	8	-3	-1	-4	0	-1.55
76	1	2	1	2	2	23	1	26.03	71			-5	-30	0	-1	-1	-2.40259	0.04	-5	1.5	-2.5	-1	4	-0.76
77	1	2	1	2	1	23	1	26.34	65						0	-13	0.357988	-0.17	-9	3	2.5	-2	3	0.12
78	1	2	1	2	2	23	1	25.96	89	0	0				0		0.860053	0.32	-1	-1.5	0.5	-7	-10	0.28
79	1	2	1	2	4	23	2	31.25	67			10	0	10	3	1	4.23883	0.04	0			-2	-7	1.38
80	1	2	1	2	4	23	1	26.9	76	0	0	2	0	0			-0.903021	-3.27	3	-1	-2	-1	2	-0.27
81	1	2	1	2	3	23	1	30.66	69			-15		-15		-1	-10.8888	1.7	-16	-7	-8	-4	-6	-3.65
82	1	2	1	2	2	23	1	40.76	64	0	0	10		10			3.29062	-0.22	3	0	-2	21	4	1.01
83	1	2	1	2	2	23	2	31.04	61	0.8	2.8				-8	-3	0.0706888	0.17	0	2	-1	3	7	0.02
84	1	2	1	2	2	23	1	32.77	76							-1	0.158065	-0.53	1	0.5	2.5	14	14	0.05
85	1	2	1	2	4	23	1	24.74	83			10		10			-1.01172	0.17	0	-2	-1	6	-2	-0.36
86	1	2	1	2	5	25	1	23.65	74	-0.8	-2.8	0	0	0	4	0	0.234117	0.03	0	2	2	2	-5	0.07
87	1	2	1	2	1	25	1	24.23	69	2.45429	8.59	0		0	8	5	1.13456	-0.51	8	-1	1.5	1	2	0.33
88	2	2	1	2	5	2	1	27.48	70				15		1	-2	2.40379	-1.11	1	1	3	-1	-10	0.83
89	2	2	1	2	5	2	1	22.1	28	3.11429	10.9		45		-2	6	-0.206284	-3.27	10	-2	0.5	10	17	-0.06
90	2	1	1	2	2	3	1	31.63	61	2.38857	8.36	30	1735	30	-15	0	-4.35552	-2.25	8	-7	-4.5	6	2	-1.46
91	2	1	1	2	5	3	2	41.94	69			0	90	20			-1.2737	-3.4	5	5	6	-1	-13	-0.46
92	2	1	1	2	3	3	2	44.01	53	0.8	2.8	10	30	10			0.436832	-0.34	4	-5	-3	4	1	0.17
93	2	1	1	2	2	3	2	34.52	43			10	105	10	19	11	1.31262		1	3	2	6	-1	0.44
94	2	1	1	2	1	3	2	24.45	68	2.23429	7.82	0	30	5	-2	-1	2.30447	-0.33	4	1	-2	0	-7	0.82
95	2	1	1	2	1	3	1	42.99	60	0	0	10	75	10	2	3	-0.513059	-0.37	1	-2	-4	5	7	-0.16
96	2	1	1	2	5	3	1	27.45	65	0	0	10	25	10	-3	-2	1.03982	-1.17	-3	2	1	-2	0	0.37
97	2	1	1	2	2	3	1	46.28	52	1.54571	5.41	10	15	20	9		-5.64243	-0.64	5	-6	0	2	8	-2.07
98	2	1	1	2	5	3	1	29.81	65			0	0	10	-1	0	-5.25494	-0.18	6	-10	-3.5	1	1	-2.02
99	2	1	6	1	4	3	2	36.65	51	-4.19429	-14.68				-6	-4	0.660646	0.45	-3	2.5	-3	2	-5	0.25
100	2	1	6	2	3	3	2	28.73	32	2.38857	8.36	0	30	10	-4	-7	-0.786892	-0.49	11	1	-2	13	10	-0.28
101	2	1	1	2	4	3	1	30.12	55	1.23429	4.32	0	30	5	-22	-5	0.180671	-0.07	4	1	1	-2	-1	0.07
102	2	1	1	2	1	3	2	33.78	47	1.23429	4.32	10	15	0	14	8	-5.75146	-0.48	-1	-3	-3	-2	-2	-2.11
103	2	1	1	2	2	3	2	46.5	55	-0.8	-2.8				18	1	1.35104	0.38	-10	3	-1	-10	-14	0.47
104	2	1	1	2	2	3	2	20.08	40	2.23429	7.82	-10	30	0		4	4.45079	-0.84	8	4.5	9.5	-4	1	1.56
105	2	1	1	2	2	3	1	35.38	50	0	0	-30	15	-50	3	5	-2.49859	-0.7	1	-1.5	-3.5	-2	-5	-0.85
106	2	1	1	2	1	3	2	38.55	70			10	15	10			-0.778371	0.35	1	9	-1	4	10	-0.29
107	2	1	1	1	1	3	2	22.61	55			30	60			4	1.44039	-0.5	23	0	-3.5	5	6	0.6
108	2	1	1	2	1	3	2	25.48	70	1.23429	4.32	10	30	10	0	1	0.852461	-0.27	3	-5	-2.5	-1	-4	0.29
109	2	1	1	2	1	3	2	38.88	58	1.52571	5.34				11	5	1.84262	-1.75	9	4	2	-6	-5	0.8
110	2	1	1	2	2	3	2	25.51	70	0	0	10	-5	0	44	12	-1.84981	-0.11	2	-2	-2.5	-1	0	-0.7
111	2	1	1	2	1	3	2	31.1	64	1.15429	4.04	5	15	10	39	13	-0.563343	0	-1	-1	-3.5	0	10	-0.22
112	2	1	6	2	1	3	2	31.33	49	0	0	10	45	10			-0.449653	-0.31	11	0	-2	7	-2	-0.16
113	2	1	1	2	2	3	2	28.73	72	1.08	3.78					1	2.47138			-1	0.5			0.95
114	2	1	1	2	2	3	2	31.3	72	1.60286	5.61	5	30	0			-1.28528	-2.21	2	-6	-2	-3	0	-0.51
115	2	1	1	2	1	3	2	30.66	55			-20	-105			2	-3.02561	0.82	-9	-2.5	-5.5	-5	-9	-1.22
116	2	1	1	2	2	3	1	32.13	78	0.897143	3.14	0	15	0			-0.634443	0.04	2	3	2.5	2	1	-0.26
117	2	1	1	2	2	3	2	31.31	55	0	0	0	-15	0	7	2	-2.6013	0	5	-4.5	-4.5	0	2	-1.12
118	2	1	1	2	5	3	2	30.1	79								-4.92882	-0.27	-1	-2.5	-3.5	-5	-3	-2.24
119	2	1	1	2	2	3	2	23.04	61	-0.725714	-2.54	-10		0	-20	-4	-0.868002	1.56	-2			0	2	-0.35
120	2	1	1	2	1	3	2	38.07	71								-6.21215	0.03	1	-17	-7	0	2	-2.37
121	2	1	1	2	4	3	2		33	1.88	6.58				11	5		-0.13	3	-3.5	0	-6	-10
122	2	1	1	2	3	5	2	35.73	63	0.725714	2.54	10	15	10	3	2	-1.25765	-0.6	1	-3	-2.5	-2	0	-0.56
123	2	1	1	2	3	5	2	29.12	40			0	15	10			0.190807	0.07	5	-3	0	-2	2	0.07
124	2	1	1	2	1	6	2	32.87	71	0	0	10	15	10	-1	-6	-1.82456	-0.27	2	-3	2	0	-6	-0.63
125	2	1	1	2	3	6	1	34.14	58	0.725714	2.54	5	30	10			-1.92839	0.72	4	0	-6	2	1	-0.61
126	2	1	1	1	1	6	2	21.85	45	2.38857	8.36	10	30	10	31	13	0.503072	-1.62	10	1	0	10	10	0.24
127	2	1	1	2	1	6	2	27.81	73	0.725714	2.54	10		10	-12	-2	1.05703	-0.1	0	5	3	0	0	0.4
128	2	1	1	2	1	6	2	21.42	73	1.08	3.78	0		10	-11	-2	0.666111	-0.08	-2	3.5	-4.5	-3	-3	0.23
129	2	1	1	2	3	8	2	19.77	69			0	30	0		2	-0.947441	-0.89	3	-2.5	-3.5	4	-1	-0.37
130	2	1	1	2	2	8	2	28.42	58	0.8	2.8	0	30	10	-5	-1	9.39413	1.55	1	5.5	8	10	8	3.5
131	2	2	1	2	1	9	1	28.71	67	1.23429	4.32	0	0	5	15	7	-3.12968	-0.21	2	1.5	-3	-3	1	-0.99
132	2	2	1	2	6	10	2	33.36	69			0	0	0	-11	-3	1.77299	-0.15	-3	1	-2.5	0	-3	0.53
133	2	1	1	2	6	10	1	20.41	32	1.15429	4.04	10	30	15	1	0	3.35847	-1.68	5	-4.5	0	3	4	1.07
134	2	1	1	2	4	12	1	30.12	64	0.725714	2.54	10	15	10	2	-2	1.7143	0.07	-2	1	1	7	3	0.61
135	2	1	1	2	2	12	2	30	75	0	0	0	15	0		5	2.32863	-0.23	3	4.5	3	-2	0	0.97
136	2	1	6	1	4	12	2	26.88	64			10		0	0	2	0.128033	-0.5	2	4	5	-2	-4	0.05
137	2	1	1	2	1	12	2	35.59	58			0		0	-1	-1	-4.38856	1.84	4	-3	-4.5	-2	-6	-1.61
138	2	1	1	2	2	13	2	23.72	28						13	8	6.32324	-0.17	4	5.5	6	3	4	2.25
139	2	1	1	2	5	13	1	21.23	59	0	0		0		8	0	-1.29068	-1.01	4	-1	-0.5	4	2	-0.42
140	2	1	1	2	2	13	2	20.52	43	4.99429	17.48	10	15	10	32	10	0.872053	-0.71	3	1	-1	4	2	0.33
141	2	1	1	2	3	14	1	54.68	52			10	35	10	-5	1	-0.442865	-1.5	2	0	-1	-3	-1	-0.16
142	2	2	1	2	5	14	1	26.82	82	-3.11429	-10.9	10		10			-2.67562	-1.63	5	6	5	6	4	-0.8
143	2	2	1	2	1	14	2	22.2	94			0		0			-8.92744		-3	4	1	-7	-5	-2.46
144	2	2	1	2	2	16	1	24.25	90						-1	-2	3.1613					-3	-8	1
145	2	1	1	2	5	16	2	21.06	73								0.877907	0.45	-1	-1	1		-6	0.29
146	2	2	1	2	3	16	2	21.05	72			0		0	1	0	0	-1.19	1	-0.5	-0.5	-2	-2	0
147	2	2	1	2	4	18	2	24.36	59	1.75143	6.13	10	75	10	-4	-11	-1.58111	-0.03	4	-2.5	-2.5	-4	-4	-0.53
148	2	1	1	2	1	19	1	37.33	56			10	25	10	5	2	3.82205	-1.07	8	0	4	7	10	1.36
149	2	1	1	2	4	20	2	35.45	75			0	0	0	25	6	-4.49162	-0.77	-5	-10	-8	1	-2	-2
150	2	1	1	2	6	22	1	31.7	51			10	30	20			0.190807	-0.81	21	-3	1	4	5	0.07
151	2	2	1	2	6	22	2	30.22	83			0	30	-10	11		-1.49604	-0.59	0	-1.5	0	2	1	-0.46
152	2	2	1	2	2	23	1	25.54	70			0	5	-5	3	2	0.189678	-0.01	3	1	0	2	1	0.06
153	2	2	1	2	2	23	1	25.94	70			10	15	20	37	12	-3.06326	-1.07	0	1.5	0	1	0	-1.09
154	2	2	1	2	4	23	2	25.71	84			0	0	10	8	-2	3.2252	-0.06	2	20	0.5	4	1	1.05
155	2	2	1	2	1	23	2	24.27	71	2.31429	8.1	10	-55	10	7	10	0.671253	-0.71	3	-1.5	0.5	-1	4	0.19
156	2	2	1	2	3	23	2	26.95	72			10	-190	10	1	5	0.186978	-0.7	7	10.5	5.5	2	1	0.06
157	2	2	1	2	2	23	1	41.53	67	1.88	6.58						-9.9439	-0.55	1	-5.5	-6	8	6	-3.1
158	2	2	1	2	4	23	2	28.39	74	2.31429	8.1				0	-8	-2.57528	-0.36	-2	-1.5	-2.5	-2	2	-0.77
159	2	2	1	2	5	23	2	52.56	67						5	4	3.01007	-0.64	-1	5	4	5	0	0.9
160	2	1	1	2	5	24	1	23.96	30			20	90	10	0	-2	-1.79904	-0.07	8	-5	1	1	7	-0.66
161	2	2	1	2	5	25	1	25.55	80			20	30	20	0	5	-0.455317	0.17	5	0	-3	3	2	-0.14
162	2	2	6	1	3	26	2	32.61	25	0	0	10	15	0	15	10	-8.07836	-0.41	1	-5.5	-5	0	14	-2.63
163	2	2	1	2	3	28	1	24	62	0	0	0	15	0	-41		0.583608	0.7	-2	-3	0	-8	0	0.19
164	2	2	1	2	5	30	2	22.97	63	0	0			10		-1	1.07325	0.36	4	5	0	6	12	0.33
165	2	2	1	2	5	30	1	30.5	73						13	2	1.56109		-1	-1	1	6	1	0.48
166	2	1	1	2	5	30	2	18.95	62	0	0	0	0	0			0.447485	0.04	10	2.5	1	-2	-2	0.15
167	2	1	1	2	5	30	2	20.73	59	0	0				-3	2	-2.97162	-0.99	0	-8	-2	-5	-3	-0.94
168	3	1	1	2	2	3		20.8	52			-5	15	0	-10	-4	2.16395	0.29	-3	-1	-3.5	0	-2	0.77
169	3	1	1	2	2	3		27.73	44						-20	-5	-0.504033	-0.76	10	6	-2	7	8	-0.2
170	3	1	1	2	1	3		34.44	69	1.23429	4.32		30	10	-14	-2	-3.48481	-0.37	5	-1	-11	6	5	-1.24
171	3	1	1	2	4	3		27.8	70	2.38857	8.36	0	15	0	0	1	2.15931	-0.2	1	-1	6	-1	-1	0.85
172	3	1	6	1	1	3		22.37	65								1.20844	0.6	2	-3	-2.5	10	7	0.43
173	3	1	1	2	1	3		24.14	48			0	30	10			1.81087	-0.83	2	4	2.5	-2	0	0.73
174	3	1	1	2	2	3		25.89	45			-5	30	0			-2.85399	-0.4	0	5	-3	-2	-3	-1.08
175	3	1	1	2	1	3		33.96	73	1.88	6.58				-5	0	-0.348388	-0.43	7	-1	2	-1	3	-0.15
176	3	1	1	2	1	3		24.77	48						5	2	3.12399	-0.03	7			2	0	1.22
177	3	1	6	1	2	3		25.16	46								5.8895	-2.21	8	7.5	3	10	18	2.3
178	3	1	1	2	2	3		32.59	50			0	15	10	23	10	4.89564		5	8.5	6	1	-3	1.69
179	3	1	1	2	1	3		26.68	49	-1.08	-3.78				15		-0.422814	-0.89	4	-4.5	0.5	-1	2	-0.16
180	3	1	1	2	3	3		27.37	61			10	60	20	20	3	-1.34896	-2.04	6	1.5	-2	-30	-19	-0.48
181	3	1	1	2	5	3		19.39	70				60	20	3		0.403227	-1.65	1	1.5	1	10	6	0.16
182	3	1	6	2	2	3		23.29	42	2.45429	8.59	0	15	10	10	-1	1.48947	-0.28	9	0	-1.5	-2	-2	0.53
183	3	1	1	2	3	3			68	1.88	6.58	0	0	-10	2	2		-1.37	1	44	-101.5	3	-3
184	3	1	1	2	2	3		20.97	42				15		7	4	4.46401	-0.55	6	5.5	0.5	-5	-4	1.8
185	3	1	3	2	3	3		23.71	61	-1.23429	-4.32		0				2.53504	-0.26	3	0	4	-3	0	0.99
186	3	1	1	2	4	3		23.27	63								-1.05564	-6.63	11	5	-2.5	4	3	-0.37
187	3	1	3	2	1	3		24.91	52			10	15	10			-0.396388	-0.08	2	2	-2	2	0	-0.15
188	3	1	1	2	3	3		21.94	50			-10	0	10			2.54537	0.54	0	1.5	3.5	-4	-2	1.01
189	3	1	1	2	1	3		23.47	69						18	15	0.371965	-2.25	5	8	1	1.5	3	0.14
190	3	1	1	2	1	3		31.63	49			0		0	-5	-2	2.80726			-3	-1	-1	-1	1.25
191	3	1	1	2	5	3		42.18	64						-5	3	16.7107		4	13.5	0	-3	-1	5.77
192	3	1	1	2	2	3		33.95	81			0		0	8	6	1.04435	-2.43		-11.5	5.5	3	4	0.34
193	3	1	1	1	1	3		26.47	69	0	0				1	-2	-1.97994	0.36	0	1.5	-6	4	11	-0.92
194	3	1	1	2	3	5		15.32	64	-1.23429	-4.32		0		29	12	2.5188	0.14	-4	1	1	-7	-10	0.91
195	3	1	1	2	3	5		36.86	78			10		30	-5	0	7.73009	-2.28	5	11	2.5	-1	0	3.22
196	3	1	1	2	1	6		35.91	75	-0.725714	-2.54	0	15	-10			2.02323	0.07	-2	10	-2	2	-2	0.64
197	3	1	1	2	3	6		18.04	72								-3.58491	-0.2	4	-0.5	-2.5	8	6	-1.4
198	3	1	1	2	3	6		24.88	70	2.38857	8.36	10	30	10	19	5	-1.95551	-0.55	7	7.5	-3	8	4	-0.74
199	3	1	1	2	1	6		31.79	75			10		20		5	-1.23002	-2.92		1	-15	-5	-4	-0.5
200	3	1	1	2	1	6		27.02	85						-14		3.92517	-3.37	3	4	4	0	2	1.44
201	3	1	1	2	1	9		31.07	46	3.11429	10.9				14	4	0.548169	-0.22	7	-2	0	0	1	0.24
202	3	1	1	2	4	9		41.37	57			0		0	0	1	-1.05703		-3	-2.5	1	0	-4	-0.4
203	3	1	1	2	6	10		21.23	48			10	30	20			7.22254	-0.03	6	10	11.5	3	5	2.57
204	3	2	1	2	5	10		25.34	40								6.24435	-1.03	4	7	11	-4	-3	1.92
205	3	1	1	2	6	10		29.6	47	1.23429	4.32						1.42281	-0.37	6	-2	0	2	1	0.47
206	3	1	1	2	4	13		35.72	61	0	0	10	15	0	2	-5	-4.92233	-0.11	1	6	-3	1	2	-1.65
207	3	2	1	2	5	13		24.3	85							7	-2.30072	-0.95	3	2	-4	0	-2	-0.76
208	3	1	1	2	3	13		21.9	26	-0.725714	-2.54	20	30	10	-17	-9	-0.460917	-0.31	1	8.5	1.5	4	5	-0.18
209	3	2	1	2	5	13		22.96	53	0	0	0	15	0			4.26321	1.97	-2	10	10.5	-5	-11	1.24
210	3	1	6	2	3	13		22.61	48	0	0						-3.11825	0	2		2.5	-4	-5	-1.18
211	3	1	1	2	1	13		23.5	61	3.11429	10.9				7	-3	-2.32692	0.55	-2	-1	0	0	0	-0.78
212	3	1	1	2	4	13		27.59	70	0	0						-5.7242			5	0	1	2	-2.1
213	3	2	1	2	1	14		33.95	77	0.725714	2.54	0	15	0			-3.71666	-0.66	4	4.5	1	-2	2	-1.21
214	3	2	1	2	3	14		26.96	76	1.88	6.58		-85		5	2	1.4047	-1.22	0	-2.5	3	-1	3	0.42
215	3	1	1	2	3	16		21.4	55						19	1	7.65813	-4.13	6	19	6.5	3	6	2.83
216	3	1	1	2	3	16		23.21	47	0	0				-9	-1	0.82739	-0.58	8	8	0	5	4	0.29
217	3	1	1	2	1	19		35.4	57	0	0		30	10	11	4	2.63225	0.99	-5			6	5	1.07
218	3	1	1	2	2	19		21.8	52			10	15	10			1.34896		-3	1.5	4	-2	0	0.48
219	3	1	1	2	4	19		21.44	42	2.45429	8.59						3.29972							1.09
220	3	1	1	2	1	19		34.65	55			10	0	10			3.64094	1.88	4	-10	3	2	1	1.29
221	3	1	1	2	3	20		26.26	70	1.08	3.78				-5	0	-4.10308	-0.21	4	3	-5	0	2	-1.46
222	3	1	1	2	2	20		22.31	63	3.11429	10.9	0	60	10	25	13	-1.87251	0.03	3	-7.5	-4	2	0	-0.78
223	3	2	1	2	2	20		25.07	66						-5	-8	5.3428		1	3	4	0	-4	1.48
224	3	1	1	2	4	21		24.12	73	0	0	10	45	20	13	-1	-0.0792776	-0.85	7	0	3	-2	1	-0.03
225	3	1	1	2	3	21		22.57	74	-1.15429	-4.04	0	-15	10			3.63612	0.33	0	11	9.5	-1	0	1.42
226	3	2	1	2	4	23		45.17	58	-0.745714	-2.61	10	102.72	10	-1	1	0.542018	0.38	3	-1.5	-1	-1	-2	0.19
227	3	2	1	2	3	23		24.38	76								-1.31262	0.11	3	-2.5	-3	-3	-1	-0.44
228	3	2	1	2	4	23		23.27	66			10	45	20			0.0295845	-0.33	6	0	-2	2	6	0.01
229	3	2	1	2	5	23		34.66	75			-10	-15	-5	0	2	-15.6345	-0.42	-4	-11	-13	6	2	-5.09
230	3	2	1	2	2	23		24.74	66						-2	1	-0.558509	0.42	-2	0	2	0	-1	-0.19
231	3	2	1	2	3	23		24.41	73	1.15429	4.04				-23	-7	0.245323	1.07	0			8	0	0.09
232	3	2	1	2	1	26		31.59	36								-2.58016	-0.56	4	3.5	0	3	2	-0.84
233	3	2	1	2	1	28		29.94	57	0.8	2.8	10	-15	0			1.40961	-0.81	5	-0.5	-4.5	-7	-20	0.41

## Sheet: Key
Variable	Value
ExerciseTiming	1	AM
	2	PM
	3	Mix
Gender	1	Female
	2	Male
Race	1	White
	2	African American
	3	Asian
	4	Native Hawaiian Pacific Islander
	5	American Indian or Alaskan Native
	6	Other
Ethnicity	1	Hispanic
	2	Non-hispanic
	3	Unknown
CancerStage	1	I
	2	II
	3	III
	4	IV
	5	No Stage
	6	Unknown
CancerType	1	Bladder
	2	Brain
	3	Breast
	4	Cervical
	5	Colorectal
	6	Endometrial
	7	Fallopian Tube
	8	Gastrointestinal
	9	Kidney
	10	Leukemia
	11	Liver
	12	Lung
	13	Lymphoma
	14	Melanoma
	15	MGUS
	16	Multiple Myeloma
	17	Myeloma
	18	Oral
	19	Ovarian
	20	Pancreas
	21	Peritoneum
	22	Polycythemia Vera
	23	Prostate
	24	Sarcoma
	25	Skin
	26	Testis
	27	Thymus
	28	Thyroid
	29	Vaginal
	30	Other
TimeOfDay_FollowUp	1	AM
	2	PM
